# Supplementary material
Source: MDPI journal article supplement (https://www.mdpi.com/2311-5637/8/6/287)
Supplement: s1 [file s1]

**Table S1.** Direct evaluation of the soil biodegradation process after 40 days of direct contact with soil.

| Materials                         | Mass per unit<br>area (g/cm <sup>2</sup> ) | Weight loss (%)              | Visually/SEM index |
|-----------------------------------|--------------------------------------------|------------------------------|--------------------|
|                                   | initial                                    | after 40 days biodegradation |                    |
| Cotton - soil #1                  | 1.835±0.03                                 | -                            | +++                |
| Cotton - soil #2                  |                                            | -                            | +++                |
| Linen - soil #1                   | 2.118±0.02                                 | 43.127                       | ++++               |
| Linen - soil #2                   |                                            | 36.019                       | +++                |
| Wool- soil #1                     | 1.959±0.10                                 | -                            | +++                |
| Wool - soil #2                    |                                            | -                            | ++                 |
| Leather - soil #1                 | 2.561±0.04                                 | 8.984                        | +                  |
| Leather - soil #2                 |                                            | 6.093                        | +                  |
| Sanitary pad brand A - soil #1    | 0.028±0.015                                | -                            | -                  |
| Sanitary pad brand A-soil #2      |                                            | -                            | -                  |
| Sanitary pad brand B - soil #1    | 0.026±0.007                                | -                            | -                  |
| Sanitary pad brand B-soil #2      |                                            | -                            | +                  |
| Cosmetic disk brand A-soil #1     | 0.020±0.04                                 | 23.883                       | ++                 |
| Cosmetic disk brand A-soil #2     |                                            | 27.537                       | ++                 |
| Cosmetic disk brand C- soil #1    | 0.019±0.02                                 | 22.069                       | ++                 |
| Cosmetic disk brand C-soil #2     |                                            | 26.410                       | ++                 |
| Antibacterial wet wipe - soil #1  | 0.0045±0.01                                | 24.332                       | -                  |
| (dry)                             |                                            |                              |                    |
| Antibacterial wet wipe - soil #2  | 0.0042±0.01                                | 19.881                       | -                  |
| (dry)                             |                                            |                              |                    |
| Sanitary wet wipe - soil #1 (dry) | 0.0042±0.01                                | 23.077                       | -                  |
| Sanitary wet wipe - soil #2 (dry) |                                            | 13.461                       | -                  |

Legend: level of biodegradation ++++ very high, +++ high, ++ medium + low - no biodegradation.

**Table S2.** Indirect evaluation of the soil biodegradation process after 40 days of direct contact with soil.

| Materials                        | NTG<br>(CFU/g soil) | Cellulolytic<br>activity increased<br>(%) | # of fungal<br>strain<br>isolated |
|----------------------------------|---------------------|-------------------------------------------|-----------------------------------|
| Soil #1                          | $5.5 \times 10^7$   | 100                                       |                                   |
| Soil # 2                         | $1.2 \times 10^7$   | 100                                       |                                   |
| Linen- soil #1                   | $2.5 \times 10^9$   | 588                                       | 1                                 |
| Sanitary pad brand A - soil #1   | $3.2 \times 10^8$   | 101                                       | 2                                 |
| Sanitary pad brand A-soil #2     | $2.6 \times 10^8$   | 94.5                                      |                                   |
| Sanitary pad brand B - soil #1   | $3.5 \times 10^8$   | 98.5                                      |                                   |
| Sanitary pad brand B-soil #2     | $1.4 \times 10^8$   | 93.8                                      |                                   |
| Cosmetic disk brand A-soil #1    | $5.6 \times 10^8$   | 207                                       | 3,4                               |
| Cosmetic disk brand A-soil #2    | $8.9 \times 10^8$   | 343.5                                     |                                   |
| Cosmetic disk brand C- soil #1   | $5.1 \times 10^8$   | 213.4                                     |                                   |
| Cosmetic disk brand C-soil #2    | $7.3 \times 10^8$   | 309.8                                     | 5,6                               |
| Antibacterial wet wipe - soil #1 | $4.3 \times 10^4$   | 133                                       |                                   |
| Antibacterial wet wipe - soil #2 | $3.9 \times 10^4$   | 126                                       | 7                                 |
| Sanitary wet wipe - soil #1      | $5.7 \times 10^4$   | 116.7                                     | 8                                 |
| Sanitary wet wipe - soil #2      | $4.1 \times 10^4$   | 127.8                                     |                                   |
